# Supplementary material for: Citizen science informs human-tick exposure in the Northeastern United States
Source: Int J Health Geogr. 2019 May 7;18:9. doi: 10.1186/s12942-019-0173-0 (PMC6505254; doi:10.1186/s12942-019-0173-0)
Supplement: Supplementary file 1 — Additional file 1. County level prevalence of Lyme and TBRF group bacteria. Supplemental file of County level Lyme and TBRF group bacteria prevalence data from citizen science collected I. scapularis ticks in the Northeastern US. [file 12942_2019_173_MOESM1_ESM.csv]

State	Name	Division	Lyme Group (# / n (%, 95% CI))	TBRF Group (# / n (%, 95% CI))
Connecticut	Fairfield	New England	3/16 (18.8, 5-46.3)	0/16 (0, 0-24.1)
Connecticut	Hartford	New England	2/23 (8.7, 1.5-29.5)	1/23 (4.3, 0.2-24)
Connecticut	Litchfield	New England	1/8 (12.5, 0.7-53.3)	0/8 (0, 0-40.2)
Connecticut	Middlesex	New England	0/11 (0, 0-32.1)	0/11 (0, 0-32.1)
Connecticut	New haven	New England	2/12 (16.7, 2.9-49.1)	0/12 (0, 0-30.1)
Connecticut	New london	New England	3/13 (23.1, 6.2-54)	0/13 (0, 0-28.3)
Connecticut	Tolland	New England	8/14 (57.1, 29.6-81.2)	0/14 (0, 0-26.8)
Connecticut	Windham	New England	3/8 (37.5, 10.2-74.1)	0/8 (0, 0-40.2)
Maine	Androscoggin	New England	2/14 (14.3, 2.5-43.8)	0/14 (0, 0-26.8)
Maine	Aroostook	New England	0/3 (0, 0-69)	0/3 (0, 0-69)
Maine	Cumberland	New England	13/67 (19.4, 11.1-31.2)	1/67 (1.5, 0.1-9.1)
Maine	Franklin	New England	0/3 (0, 0-69)	0/3 (0, 0-69)
Maine	Hancock	New England	6/46 (13, 5.4-27)	0/46 (0, 0-9.6)
Maine	Kennebec	New England	5/22 (22.7, 8.7-45.8)	0/22 (0, 0-18.5)
Maine	Knox	New England	9/29 (31, 16-51)	0/29 (0, 0-14.6)
Maine	Lincoln	New England	5/26 (19.2, 7.3-40)	0/26 (0, 0-16)
Maine	Oxford	New England	0/3 (0, 0-69)	0/3 (0, 0-69)
Maine	Penobscot	New England	8/33 (24.2, 11.7-42.6)	0/33 (0, 0-13)
Maine	Piscataquis	New England	0/2 (0, 0-80.2)	0/2 (0, 0-80.2)
Maine	Sagadahoc	New England	2/17 (11.8, 2.1-37.7)	0/17 (0, 0-22.9)
Maine	Somerset	New England	0/7 (0, 0-43.9)	0/7 (0, 0-43.9)
Maine	Waldo	New England	4/25 (16, 5.3-36.9)	0/25 (0, 0-16.6)
Maine	Washington	New England	0/4 (0, 0-60.4)	0/4 (0, 0-60.4)
Maine	York	New England	4/38 (10.5, 3.4-25.7)	0/38 (0, 0-11.4)
Massachusetts	Barnstable	New England	9/29 (31, 16-51)	1/29 (3.4, 0.2-19.6)
Massachusetts	Berkshire	New England	6/14 (42.9, 18.8-70.4)	0/14 (0, 0-26.8)
Massachusetts	Bristol	New England	6/22 (27.3, 11.6-50.4)	1/22 (4.5, 0.2-24.9)
Massachusetts	Dukes	New England	1/5 (20, 1.1-70.1)	0/5 (0, 0-53.7)
Massachusetts	Essex	New England	7/26 (26.9, 12.4-48.1)	1/26 (3.8, 0.2-21.6)
Massachusetts	Franklin	New England	0/5 (0, 0-53.7)	0/5 (0, 0-53.7)
Massachusetts	Hampden	New England	1/6 (16.7, 0.9-63.5)	0/6 (0, 0-48.3)
Massachusetts	Hampshire	New England	5/7 (71.4, 30.3-94.9)	0/7 (0, 0-43.9)
Massachusetts	Middlesex	New England	17/81 (21, 13-31.7)	0/81 (0, 0-5.6)
Massachusetts	Nantucket	New England	0/0 (0, 0-0)	0/0 (0, 0-0)
Massachusetts	Norfolk	New England	9/45 (20, 10.1-35.1)	1/45 (2.2, 0.1-13.2)
Massachusetts	Plymouth	New England	14/89 (15.7, 9.2-25.3)	1/89 (1.1, 0.1-7)
Massachusetts	Suffolk	New England	2/4 (50, 15-85)	0/4 (0, 0-60.4)
Massachusetts	Worcester	New England	33/97 (34, 24.9-44.4)	1/97 (1, 0.1-6.4)
New Hampshire	Belknap	New England	0/5 (0, 0-53.7)	0/5 (0, 0-53.7)
New Hampshire	Carroll	New England	3/11 (27.3, 7.3-60.7)	0/11 (0, 0-32.1)
New Hampshire	Cheshire	New England	1/9 (11.1, 0.6-49.3)	1/9 (11.1, 0.6-49.3)
New Hampshire	Coos	New England	0/0 (0, 0-0)	0/0 (0, 0-0)
New Hampshire	Grafton	New England	1/5 (20, 1.1-70.1)	0/5 (0, 0-53.7)
New Hampshire	Hillsborough	New England	8/36 (22.2, 10.7-39.6)	0/36 (0, 0-12)
New Hampshire	Merrimack	New England	10/28 (35.7, 19.3-55.9)	1/28 (3.6, 0.2-20.2)
New Hampshire	Rockingham	New England	9/39 (23.1, 11.7-39.7)	0/39 (0, 0-11.2)
New Hampshire	Strafford	New England	3/16 (18.8, 5-46.3)	2/16 (12.5, 2.2-39.6)
New Hampshire	Sullivan	New England	1/3 (33.3, 1.8-87.5)	0/3 (0, 0-69)
New Jersey	Atlantic	Middle Atlantic	0/1 (0, 0-94.5)	0/1 (0, 0-94.5)
New Jersey	Bergen	Middle Atlantic	0/10 (0, 0-34.5)	0/10 (0, 0-34.5)
New Jersey	Burlington	Middle Atlantic	0/5 (0, 0-53.7)	0/5 (0, 0-53.7)
New Jersey	Camden	Middle Atlantic	0/1 (0, 0-94.5)	0/1 (0, 0-94.5)
New Jersey	Cape may	Middle Atlantic	0/1 (0, 0-94.5)	0/1 (0, 0-94.5)
New Jersey	Cumberland	Middle Atlantic	0/0 (0, 0-0)	0/0 (0, 0-0)
New Jersey	Essex	Middle Atlantic	0/3 (0, 0-69)	0/3 (0, 0-69)
New Jersey	Gloucester	Middle Atlantic	0/3 (0, 0-69)	0/3 (0, 0-69)
New Jersey	Hudson	Middle Atlantic	1/1 (100, 5.5-100)	0/1 (0, 0-94.5)
New Jersey	Hunterdon	Middle Atlantic	1/16 (6.2, 0.3-32.3)	0/16 (0, 0-24.1)
New Jersey	Mercer	Middle Atlantic	0/5 (0, 0-53.7)	0/5 (0, 0-53.7)
New Jersey	Middlesex	Middle Atlantic	1/5 (20, 1.1-70.1)	1/5 (20, 1.1-70.1)
New Jersey	Monmouth	Middle Atlantic	3/15 (20, 5.3-48.6)	0/15 (0, 0-25.3)
New Jersey	Morris	Middle Atlantic	4/29 (13.8, 4.5-32.6)	1/29 (3.4, 0.2-19.6)
New Jersey	Ocean	Middle Atlantic	0/6 (0, 0-48.3)	0/6 (0, 0-48.3)
New Jersey	Passaic	Middle Atlantic	1/6 (16.7, 0.9-63.5)	0/6 (0, 0-48.3)
New Jersey	Salem	Middle Atlantic	0/2 (0, 0-80.2)	0/2 (0, 0-80.2)
New Jersey	Somerset	Middle Atlantic	1/11 (9.1, 0.5-42.9)	0/11 (0, 0-32.1)
New Jersey	Sussex	Middle Atlantic	4/18 (22.2, 7.4-48.1)	0/18 (0, 0-21.9)
New Jersey	Union	Middle Atlantic	1/5 (20, 1.1-70.1)	1/5 (20, 1.1-70.1)
New Jersey	Warren	Middle Atlantic	2/6 (33.3, 6-75.9)	0/6 (0, 0-48.3)
New York	Albany	Middle Atlantic	9/40 (22.5, 11.4-38.9)	0/40 (0, 0-10.9)
New York	Allegany	Middle Atlantic	0/0 (0, 0-0)	0/0 (0, 0-0)
New York	Bronx	Middle Atlantic	1/1 (100, 5.5-100)	0/1 (0, 0-94.5)
New York	Broome	Middle Atlantic	3/11 (27.3, 7.3-60.7)	0/11 (0, 0-32.1)
New York	Cattaraugus	Middle Atlantic	0/1 (0, 0-94.5)	0/1 (0, 0-94.5)
New York	Cayuga	Middle Atlantic	0/2 (0, 0-80.2)	0/2 (0, 0-80.2)
New York	Chautauqua	Middle Atlantic	0/1 (0, 0-94.5)	0/1 (0, 0-94.5)
New York	Chemung	Middle Atlantic	1/9 (11.1, 0.6-49.3)	0/9 (0, 0-37.1)
New York	Chenango	Middle Atlantic	4/10 (40, 13.7-72.6)	0/10 (0, 0-34.5)
New York	Clinton	Middle Atlantic	0/5 (0, 0-53.7)	0/5 (0, 0-53.7)
New York	Columbia	Middle Atlantic	7/25 (28, 12.9-49.6)	0/25 (0, 0-16.6)
New York	Cortland	Middle Atlantic	0/0 (0, 0-0)	0/0 (0, 0-0)
New York	Delaware	Middle Atlantic	1/5 (20, 1.1-70.1)	1/5 (20, 1.1-70.1)
New York	Dutchess	Middle Atlantic	14/47 (29.8, 17.8-45.1)	1/47 (2.1, 0.1-12.7)
New York	Erie	Middle Atlantic	0/6 (0, 0-48.3)	1/6 (16.7, 0.9-63.5)
New York	Essex	Middle Atlantic	1/3 (33.3, 1.8-87.5)	0/3 (0, 0-69)
New York	Franklin	Middle Atlantic	0/2 (0, 0-80.2)	0/2 (0, 0-80.2)
New York	Fulton	Middle Atlantic	0/2 (0, 0-80.2)	0/2 (0, 0-80.2)
New York	Genesee	Middle Atlantic	0/1 (0, 0-94.5)	0/1 (0, 0-94.5)
New York	Greene	Middle Atlantic	3/8 (37.5, 10.2-74.1)	0/8 (0, 0-40.2)
New York	Hamilton	Middle Atlantic	0/0 (0, 0-0)	0/0 (0, 0-0)
New York	Herkimer	Middle Atlantic	1/6 (16.7, 0.9-63.5)	0/6 (0, 0-48.3)
New York	Jefferson	Middle Atlantic	0/2 (0, 0-80.2)	0/2 (0, 0-80.2)
New York	Kings	Middle Atlantic	0/3 (0, 0-69)	0/3 (0, 0-69)
New York	Lewis	Middle Atlantic	0/0 (0, 0-0)	0/0 (0, 0-0)
New York	Livingston	Middle Atlantic	0/2 (0, 0-80.2)	0/2 (0, 0-80.2)
New York	Madison	Middle Atlantic	0/2 (0, 0-80.2)	0/2 (0, 0-80.2)
New York	Monroe	Middle Atlantic	3/11 (27.3, 7.3-60.7)	0/11 (0, 0-32.1)
New York	Montgomery	Middle Atlantic	0/1 (0, 0-94.5)	0/1 (0, 0-94.5)
New York	Nassau	Middle Atlantic	1/8 (12.5, 0.7-53.3)	0/8 (0, 0-40.2)
New York	New york	Middle Atlantic	0/3 (0, 0-69)	0/3 (0, 0-69)
New York	Niagara	Middle Atlantic	0/3 (0, 0-69)	0/3 (0, 0-69)
New York	Oneida	Middle Atlantic	0/11 (0, 0-32.1)	0/11 (0, 0-32.1)
New York	Onondaga	Middle Atlantic	5/19 (26.3, 10.1-51.4)	0/19 (0, 0-20.9)
New York	Ontario	Middle Atlantic	1/8 (12.5, 0.7-53.3)	0/8 (0, 0-40.2)
New York	Orange	Middle Atlantic	3/13 (23.1, 6.2-54)	0/13 (0, 0-28.3)
New York	Orleans	Middle Atlantic	0/0 (0, 0-0)	0/0 (0, 0-0)
New York	Oswego	Middle Atlantic	1/5 (20, 1.1-70.1)	0/5 (0, 0-53.7)
New York	Otsego	Middle Atlantic	1/8 (12.5, 0.7-53.3)	0/8 (0, 0-40.2)
New York	Putnam	Middle Atlantic	2/8 (25, 4.5-64.4)	0/8 (0, 0-40.2)
New York	Queens	Middle Atlantic	0/0 (0, 0-0)	0/0 (0, 0-0)
New York	Rensselaer	Middle Atlantic	7/33 (21.2, 9.6-39.4)	0/33 (0, 0-13)
New York	Richmond	Middle Atlantic	1/8 (12.5, 0.7-53.3)	0/8 (0, 0-40.2)
New York	Rockland	Middle Atlantic	0/17 (0, 0-22.9)	0/17 (0, 0-22.9)
New York	Saratoga	Middle Atlantic	16/71 (22.5, 13.8-34.3)	1/71 (1.4, 0.1-8.7)
New York	Schenectady	Middle Atlantic	5/17 (29.4, 11.4-56)	1/17 (5.9, 0.3-30.8)
New York	Schoharie	Middle Atlantic	0/1 (0, 0-94.5)	0/1 (0, 0-94.5)
New York	Schuyler	Middle Atlantic	0/1 (0, 0-94.5)	0/1 (0, 0-94.5)
New York	Seneca	Middle Atlantic	0/2 (0, 0-80.2)	0/2 (0, 0-80.2)
New York	St. Lawrence	Middle Atlantic	6/11 (54.5, 24.6-81.9)	0/11 (0, 0-32.1)
New York	Steuben	Middle Atlantic	0/2 (0, 0-80.2)	0/2 (0, 0-80.2)
New York	Suffolk	Middle Atlantic	2/46 (4.3, 0.8-16)	0/46 (0, 0-9.6)
New York	Sullivan	Middle Atlantic	1/8 (12.5, 0.7-53.3)	0/8 (0, 0-40.2)
New York	Tioga	Middle Atlantic	1/2 (50, 9.5-90.5)	0/2 (0, 0-80.2)
New York	Tompkins	Middle Atlantic	3/27 (11.1, 2.9-30.3)	1/27 (3.7, 0.2-20.9)
New York	Ulster	Middle Atlantic	9/45 (20, 10.1-35.1)	1/45 (2.2, 0.1-13.2)
New York	Warren	Middle Atlantic	13/42 (31, 18.1-47.2)	1/42 (2.4, 0.1-14.1)
New York	Washington	Middle Atlantic	5/24 (20.8, 7.9-42.7)	0/24 (0, 0-17.2)
New York	Wayne	Middle Atlantic	0/3 (0, 0-69)	0/3 (0, 0-69)
New York	Westchester	Middle Atlantic	5/32 (15.6, 5.9-33.5)	0/32 (0, 0-13.3)
New York	Wyoming	Middle Atlantic	0/1 (0, 0-94.5)	0/1 (0, 0-94.5)
New York	Yates	Middle Atlantic	1/1 (100, 5.5-100)	0/1 (0, 0-94.5)
Pennsylvania	Adams	Middle Atlantic	1/12 (8.3, 0.4-40.2)	0/12 (0, 0-30.1)
Pennsylvania	Allegheny	Middle Atlantic	7/32 (21.9, 9.9-40.4)	2/32 (6.2, 1.1-22.2)
Pennsylvania	Armstrong	Middle Atlantic	1/4 (25, 1.3-78.1)	1/4 (25, 1.3-78.1)
Pennsylvania	Beaver	Middle Atlantic	1/8 (12.5, 0.7-53.3)	0/8 (0, 0-40.2)
Pennsylvania	Bedford	Middle Atlantic	0/3 (0, 0-69)	0/3 (0, 0-69)
Pennsylvania	Berks	Middle Atlantic	1/7 (14.3, 0.8-58)	0/7 (0, 0-43.9)
Pennsylvania	Blair	Middle Atlantic	1/9 (11.1, 0.6-49.3)	0/9 (0, 0-37.1)
Pennsylvania	Bradford	Middle Atlantic	3/15 (20, 5.3-48.6)	0/15 (0, 0-25.3)
Pennsylvania	Bucks	Middle Atlantic	8/35 (22.9, 11-40.6)	2/35 (5.7, 1-20.5)
Pennsylvania	Butler	Middle Atlantic	2/9 (22.2, 3.9-59.8)	0/9 (0, 0-37.1)
Pennsylvania	Cambria	Middle Atlantic	2/3 (66.7, 12.5-98.2)	0/3 (0, 0-69)
Pennsylvania	Cameron	Middle Atlantic	0/1 (0, 0-94.5)	0/1 (0, 0-94.5)
Pennsylvania	Carbon	Middle Atlantic	0/1 (0, 0-94.5)	0/1 (0, 0-94.5)
Pennsylvania	Centre	Middle Atlantic	5/27 (18.5, 7-38.7)	0/27 (0, 0-15.5)
Pennsylvania	Chester	Middle Atlantic	7/44 (15.9, 7.2-30.7)	2/44 (4.5, 0.8-16.7)
Pennsylvania	Clarion	Middle Atlantic	0/2 (0, 0-80.2)	0/2 (0, 0-80.2)
Pennsylvania	Clearfield	Middle Atlantic	0/0 (0, 0-0)	0/0 (0, 0-0)
Pennsylvania	Clinton	Middle Atlantic	0/2 (0, 0-80.2)	0/2 (0, 0-80.2)
Pennsylvania	Columbia	Middle Atlantic	0/1 (0, 0-94.5)	0/1 (0, 0-94.5)
Pennsylvania	Crawford	Middle Atlantic	0/1 (0, 0-94.5)	0/1 (0, 0-94.5)
Pennsylvania	Cumberland	Middle Atlantic	3/22 (13.6, 3.6-36)	0/22 (0, 0-18.5)
Pennsylvania	Dauphin	Middle Atlantic	1/7 (14.3, 0.8-58)	1/7 (14.3, 0.8-58)
Pennsylvania	Delaware	Middle Atlantic	1/14 (7.1, 0.4-35.8)	0/14 (0, 0-26.8)
Pennsylvania	Elk	Middle Atlantic	0/0 (0, 0-0)	0/0 (0, 0-0)
Pennsylvania	Erie	Middle Atlantic	0/3 (0, 0-69)	0/3 (0, 0-69)
Pennsylvania	Fayette	Middle Atlantic	0/5 (0, 0-53.7)	0/5 (0, 0-53.7)
Pennsylvania	Forest	Middle Atlantic	0/1 (0, 0-94.5)	0/1 (0, 0-94.5)
Pennsylvania	Franklin	Middle Atlantic	4/32 (12.5, 4.1-29.9)	2/32 (6.2, 1.1-22.2)
Pennsylvania	Fulton	Middle Atlantic	0/1 (0, 0-94.5)	0/1 (0, 0-94.5)
Pennsylvania	Greene	Middle Atlantic	0/1 (0, 0-94.5)	0/1 (0, 0-94.5)
Pennsylvania	Huntingdon	Middle Atlantic	4/9 (44.4, 15.3-77.3)	1/9 (11.1, 0.6-49.3)
Pennsylvania	Indiana	Middle Atlantic	0/5 (0, 0-53.7)	0/5 (0, 0-53.7)
Pennsylvania	Jefferson	Middle Atlantic	0/0 (0, 0-0)	0/0 (0, 0-0)
Pennsylvania	Juniata	Middle Atlantic	0/3 (0, 0-69)	0/3 (0, 0-69)
Pennsylvania	Lackawanna	Middle Atlantic	2/10 (20, 3.5-55.8)	1/10 (10, 0.5-45.9)
Pennsylvania	Lancaster	Middle Atlantic	1/15 (6.7, 0.3-34)	0/15 (0, 0-25.3)
Pennsylvania	Lawrence	Middle Atlantic	0/4 (0, 0-60.4)	0/4 (0, 0-60.4)
Pennsylvania	Lebanon	Middle Atlantic	2/13 (15.4, 2.7-46.3)	0/13 (0, 0-28.3)
Pennsylvania	Lehigh	Middle Atlantic	3/19 (15.8, 4.2-40.5)	0/19 (0, 0-20.9)
Pennsylvania	Luzerne	Middle Atlantic	3/11 (27.3, 7.3-60.7)	0/11 (0, 0-32.1)
Pennsylvania	Lycoming	Middle Atlantic	0/11 (0, 0-32.1)	0/11 (0, 0-32.1)
Pennsylvania	Mckean	Middle Atlantic	0/1 (0, 0-94.5)	0/1 (0, 0-94.5)
Pennsylvania	Mercer	Middle Atlantic	2/8 (25, 4.5-64.4)	0/8 (0, 0-40.2)
Pennsylvania	Mifflin	Middle Atlantic	0/0 (0, 0-0)	0/0 (0, 0-0)
Pennsylvania	Monroe	Middle Atlantic	6/25 (24, 10.2-45.5)	0/25 (0, 0-16.6)
Pennsylvania	Montgomery	Middle Atlantic	1/20 (5, 0.3-26.9)	0/20 (0, 0-20)
Pennsylvania	Montour	Middle Atlantic	0/0 (0, 0-0)	0/0 (0, 0-0)
Pennsylvania	Northampton	Middle Atlantic	4/13 (30.8, 10.4-61.1)	0/13 (0, 0-28.3)
Pennsylvania	Northumberland	Middle Atlantic	0/0 (0, 0-0)	0/0 (0, 0-0)
Pennsylvania	Perry	Middle Atlantic	2/2 (100, 19.8-100)	0/2 (0, 0-80.2)
Pennsylvania	Philadelphia	Middle Atlantic	0/2 (0, 0-80.2)	1/2 (50, 9.5-90.5)
Pennsylvania	Pike	Middle Atlantic	8/40 (20, 9.6-36.1)	1/40 (2.5, 0.1-14.7)
Pennsylvania	Potter	Middle Atlantic	0/0 (0, 0-0)	0/0 (0, 0-0)
Pennsylvania	Schuylkill	Middle Atlantic	0/1 (0, 0-94.5)	0/1 (0, 0-94.5)
Pennsylvania	Snyder	Middle Atlantic	0/1 (0, 0-94.5)	0/1 (0, 0-94.5)
Pennsylvania	Somerset	Middle Atlantic	0/0 (0, 0-0)	0/0 (0, 0-0)
Pennsylvania	Sullivan	Middle Atlantic	0/1 (0, 0-94.5)	0/1 (0, 0-94.5)
Pennsylvania	Susquehanna	Middle Atlantic	1/8 (12.5, 0.7-53.3)	0/8 (0, 0-40.2)
Pennsylvania	Tioga	Middle Atlantic	0/1 (0, 0-94.5)	0/1 (0, 0-94.5)
Pennsylvania	Union	Middle Atlantic	0/1 (0, 0-94.5)	0/1 (0, 0-94.5)
Pennsylvania	Venango	Middle Atlantic	0/4 (0, 0-60.4)	0/4 (0, 0-60.4)
Pennsylvania	Warren	Middle Atlantic	2/7 (28.6, 5.1-69.7)	0/7 (0, 0-43.9)
Pennsylvania	Washington	Middle Atlantic	2/5 (40, 7.3-83)	0/5 (0, 0-53.7)
Pennsylvania	Wayne	Middle Atlantic	9/34 (26.5, 13.5-44.7)	0/34 (0, 0-12.6)
Pennsylvania	Westmoreland	Middle Atlantic	0/9 (0, 0-37.1)	0/9 (0, 0-37.1)
Pennsylvania	Wyoming	Middle Atlantic	0/10 (0, 0-34.5)	0/10 (0, 0-34.5)
Pennsylvania	York	Middle Atlantic	4/14 (28.6, 9.6-58)	1/14 (7.1, 0.4-35.8)
Rhode Island	Bristol	New England	0/0 (0, 0-0)	0/0 (0, 0-0)
Rhode Island	Kent	New England	1/2 (50, 9.5-90.5)	0/2 (0, 0-80.2)
Rhode Island	Newport	New England	0/4 (0, 0-60.4)	0/4 (0, 0-60.4)
Rhode Island	Providence	New England	5/18 (27.8, 10.7-53.6)	0/18 (0, 0-21.9)
Rhode Island	Washington	New England	5/11 (45.5, 18.1-75.4)	0/11 (0, 0-32.1)
Vermont	Addison	New England	0/5 (0, 0-53.7)	0/5 (0, 0-53.7)
Vermont	Bennington	New England	3/10 (30, 8.1-64.6)	0/10 (0, 0-34.5)
Vermont	Caledonia	New England	0/0 (0, 0-0)	0/0 (0, 0-0)
Vermont	Chittenden	New England	2/10 (20, 3.5-55.8)	0/10 (0, 0-34.5)
Vermont	Essex	New England	0/0 (0, 0-0)	0/0 (0, 0-0)
Vermont	Franklin	New England	1/3 (33.3, 1.8-87.5)	0/3 (0, 0-69)
Vermont	Grand isle	New England	0/0 (0, 0-0)	0/0 (0, 0-0)
Vermont	Lamoille	New England	0/1 (0, 0-94.5)	0/1 (0, 0-94.5)
Vermont	Orange	New England	0/4 (0, 0-60.4)	0/4 (0, 0-60.4)
Vermont	Orleans	New England	0/5 (0, 0-53.7)	0/5 (0, 0-53.7)
Vermont	Rutland	New England	2/2 (100, 19.8-100)	0/2 (0, 0-80.2)
Vermont	Washington	New England	0/2 (0, 0-80.2)	0/2 (0, 0-80.2)
Vermont	Windham	New England	5/21 (23.8, 9.1-47.5)	0/21 (0, 0-19.2)
Vermont	Windsor	New England	1/6 (16.7, 0.9-63.5)	0/6 (0, 0-48.3)
